# Supplementary material for: Optogenetic delivery of trophic signals in a genetic model of Parkinson’s disease
Source: PLoS Genet. 2021 Apr 15;17(4):e1009479. doi: 10.1371/journal.pgen.1009479 (PMC8049241; doi:10.1371/journal.pgen.1009479)
Supplement: S5 Table — (XLSX) [file pgen.1009479.s014.xlsx]

## Sheet: Data
Ingles-Prieto et al.: S5 Table
Fig 1C	Opto-hRET		Opto-dRET		Opto-dRET(MEN2B)		mock
	bar 1	bar 2	bar 1	bar 2	bar 1	bar 2	bar 1	bar 2
mean	34029	142143	40810	117142	93865	90779	3788	6247
error	14896	18735	6700	24764	25706	28623	863	1456
Fig 2H	bar 1	bar 2	bar 3	bar 4	bar 5	bar 6
10th perc		79.5	3.4	3.4	16.9	35.8
25th perc	0	81.2	4.9	4.7	21.4	46
median	0	91.8	13	15.5	27.1	52.6
75th perc	0.1	95.6	19.4	18.6	38.2	69.8
90th perc		97.8	24.4	24.7	41.5	84.4
Fig 2I	bar 1	bar 2	bar 3	bar 4	bar 5	bar 6
10th perc	577	118	324	381	289	163
25th perc	591	122	431	425	357	207
median	636	183	546	460	407	292
75th perc	642	189	607	568	555	365
90th perc	643	189	646	631	652	449
Fig 3B	bar 1	bar 2	bar 3	bar 4	bar 5
mean	0	54.8	62.5	14	0
error	0	7.7	4.1	7.2	0
Fig 3C	bar 1	bar 2	bar 3	bar 4	bar 5
mean	84	76.8	65.1	56.5	76.4
error	5.2	6	6.4	6.3	5.8
Fig 4A	bar 1	bar 2	bar 3	bar 4
10th perc	0.435	0.274	0.293	0.349
25th perc	0.493	0.321	0.323	0.414
median	0.922	0.375	0.423	0.591
75th perc	1.528	0.445	0.495	0.968
90th perc	1.751	0.614	0.599	1.382
Fig 4F	bar 1	bar 2	bar 3	bar 4
10th perc	54.7	10.2	14.3	53.6
25th perc	59.2	13.1	20.1	62.2
median	68.8	22.1	22.5	71.6
75th perc	80.5	28.3	30.8	78.9
90th perc	90	35.3	40.6	89.1
Fig 5D	bar 1	bar 2	bar 3	bar 4	bar 5	bar 6	bar 7	bar 8
mean	20.1	65.4	18.1	27.5	68.7	29.1	69	69.3
error	2.5	6.6	1.5	5.7	6.2	5	6.4	2.2
Fig 5E	bar 1	bar 2	bar 3	bar 4	bar 5	bar 6	bar 7
mean	17.7	64.8	70.5	33.1	58.1	62.4	38
error	1.3	4.2	4.8	3.7	2.6	1.6	1.8
S2 Fig	mock	Opto-hRET		hRET-FKBP
	bar 1	bar 2	bar 3	bar 4	bar 5
mean	1	3.1	12.5	2.9	11.8
error	0.3	0.9	3.1	1	2
S4D Fig	bar 1	bar 2
10th perc	16.9	13.7
25th perc	21.4	21.8
median	27.1	24.2
75th perc	38.2	34.2
90th perc	41.5	36.4
S4E Fig	bar 1	bar 2
10th perc	289	277
25th perc	357	334
median	407	453
75th perc	555	592
90th perc	652	665
S5 Fig	bar 1	bar 2
mean	1	2.68086
error	0.258055	0.216139
S6 Fig	bar 1	bar 2
mean	48.8	53.6
error	7.8	6
S7 Fig	bar 1	bar 2
mean	65.1	60.8
error	6.4	6.5
S8 Fig	bar 1	bar 2	bar 3
10th perc	0.435	0.274	0.113
25th perc	0.493	0.321	0.264
median	0.922	0.375	0.413
75th perc	1.528	0.445	0.502
90th perc	1.751	0.614	0.719
S9 Fig	bar 1	bar 2	bar 3	bar 4	bar 5
mean	20.1	19.5	66.1	17.7	28
error	2.5	2.5	9.9	1.8	4.2
